# Supplementary material
Source: MDPI journal article supplement (https://www.mdpi.com/1999-4907/8/12/507)
Supplement: s1 [file s1]

## Supplementary Materials

**Table S1.** Variables considered to evaluate temporal changes of the effect of urban and peri-urban forest patch characteristics on bird species richness in the urban region of Milan (northern Italy).

| Environmental variables                                  | Variable Type | Mean     | Min–Max        |
|----------------------------------------------------------|---------------|----------|----------------|
| TYPE                                                     | Categorical   | -        | -              |
| Protected area/Not protected area                        | Categorical   | -        | -              |
| Urban/Peri-urban forest                                  | Categorical   | -        | -              |
| <u>Year 2000 UPUFs (N = 240)</u>                         |               |          |                |
| Patch area                                               | Continuous    | 54.7 ha  | 0.2–905.7 ha   |
| Minimum distance from the nearest source area            | Continuous    | 11.1 km  | 0–46.6 km      |
| Surface occupied by forests (buffer of 1000 m)           | Continuous    | 225.9 ha | 4.8–1947.6 ha  |
| Number of neighbouring forest patches (buffer of 1000 m) | Continuous    | 26       | 2–135          |
| Surface occupied by urban areas (buffer of 1000 m)       | Continuous    | 184.5 ha | 0–1582.9 ha    |
| Number of neighbouring urban patches (buffer of 1000 m)  | Continuous    | 31       | 0–199          |
| <u>Year 2012 UPUFs (N = 240)</u>                         |               |          |                |
| Patch area                                               | Continuous    | 47.6 ha  | 0.4–906.5 ha   |
| Minimum distance from the nearest source area            | Continuous    | 11.5 km  | 0–47.3 km      |
| Surface occupied by forests (buffer of 1000 m)           | Continuous    | 182.0 ha | 1.6–1933.5 ha  |
| Number of neighbouring forest patches (buffer of 1000 m) | Continuous    | 32       | 3–173          |
| Surface occupied by urban areas (buffer of 1000 m)       | Continuous    | 220.6 ha | 3.2–2417.2 ha  |
| Number of neighbouring urban patches (buffer of 1000 m)  | Continuous    | 38       | 3–208          |
| <u>Year 2000 UFs (N = 125)</u>                           |               |          |                |
| Patch area                                               | Continuous    | 30.0 ha  | 0.2–399.8 ha   |
| Minimum distance from the nearest source area            | Continuous    | 11.2 km  | 0–45.7 km      |
| Surface occupied by forests (buffer of 1000 m)           | Continuous    | 152.3 ha | 4.8–1016.4 ha  |
| Number of neighbouring forest patches (buffer of 1000 m) | Continuous    | 27       | 2–135          |
| Surface occupied by urban areas (buffer of 1000 m)       | Continuous    | 220.7 ha | 16.2–1582.9 ha |
| Number of neighbouring urban patches (buffer of 1000 m)  | Continuous    | 31       | 2–199          |
| <u>Year 2012 UFs (N = 158)</u>                           |               |          |                |
| Patch area                                               | Continuous    | 22.8 ha  | 0.35–848.5 ha  |
| Minimum distance from the nearest source area            | Continuous    | 12.2 km  | 0–47.3 km      |
| Surface occupied by forests (buffer of 1000 m)           | Continuous    | 121.2 ha | 1.6–1502.2 ha  |
| Number of neighbouring forest patches (buffer of 1000 m) | Continuous    | 30 ha    | 3–173 ha       |
| Surface occupied by urban areas (buffer of 1000 m)       | Continuous    | 223.0 ha | 13.2–2417.2 ha |
| Number of neighbouring urban patches (buffer of 1000 m)  | Continuous    | 32       | 3–208          |
| <u>Year 2000 PUFs (N = 115)</u>                          |               |          |                |
| Patch area                                               | Continuous    | 81.6 ha  | 0.3–905.7 ha   |
| Minimum distance from the nearest source area            | Continuous    | 10.9 km  | 0–46.6 km      |
| Surface occupied by forests (buffer of 1000 m)           | Continuous    | 306.0 ha | 6.4–1947.6 ha  |
| Number of neighbouring forest patches (buffer of 1000 m) | Continuous    | 26       | 4–116          |
| Surface occupied by urban areas (buffer of 1000 m)       | Continuous    | 145.2 ha | 0–1065.7 ha    |
| Number of neighbouring urban patches (buffer of 1000 m)  | Continuous    | 31       | 0–153          |
| <u>Year 2012 PUFs (N = 82)</u>                           |               |          |                |
| Patch area                                               | Continuous    | 95.5 ha  | 0.3–903.5 ha   |
| Minimum distance from the nearest source area            | Continuous    | 10.4 ha  | 0–45.4 ha      |
| Surface occupied by forests (buffer of 1000 m)           | Continuous    | 299.1 ha | 4.9–1933.5 ha  |
| Number of neighbouring forest patches (buffer of 1000 m) | Continuous    | 35.3 ha  | 5–142          |
| Surface occupied by urban areas (buffer of 1000 m)       | Continuous    | 215.9 ha | 3.2–1375.7 ha  |
| Number of neighbouring urban patches (buffer of 1000 m)  | Continuous    | 48 ha    | 3–150 ha       |

**Table S2.** List of all forest-dependent bird species considered for the time-windows 1998–2002 and 2010–2014 to evaluate temporal changes of the effect of urban and peri-urban forest patch characteristics on bird species richness in the urban region of Milan (northern Italy).

| Species                                             | 1998–2002 | 2010–2014 |
|-----------------------------------------------------|-----------|-----------|
| Black kite <i>Milvus migrans</i>                    | +         | +         |
| Common buzzard <i>Buteo buteo</i>                   | +         | -         |
| Common pheasant <i>Phasianus colchicus</i>          | +         | +         |
| Common wood pigeon <i>Columba palumbus</i>          | +         | +         |
| European turtle dove <i>Streptopelia turtur</i>     | +         | +         |
| Common cuckoo <i>Cuculus canorus</i>                | +         | +         |
| Eurasian Wryneck <i>Jynx torquilla</i>              | +         | -         |
| European green woodpecker <i>Picus viridis</i>      | +         | +         |
| Great spotted woodpecker <i>Dendrocopos major</i>   | +         | +         |
| Eurasian wren <i>Troglodytes troglodytes</i>        | +         | +         |
| European robin <i>Erithacus rubecula</i>            | +         | +         |
| Common nightingale <i>Luscinia megarhynchos</i>     | +         | +         |
| Common redstart <i>Phoenicurus phoenicurus</i>      | +         | +         |
| Common blackbird <i>Turdus merula</i>               | +         | +         |
| Cetti's Warbler <i>Cettia cetti</i>                 | +         | -         |
| Melodious warbler <i>Hippolais polyglotta</i>       | +         | +         |
| Eurasian blackcap <i>Sylvia atricapilla</i>         | +         | +         |
| Common chiffchaff <i>Phylloscopus collybita</i>     | +         | -         |
| Spotted flycatcher <i>Muscicapa striata</i>         | +         | +         |
| Long-tailed tit <i>Aegithalos caudatus</i>          | +         | +         |
| Marsh tit <i>Poecile palustris</i>                  | +         | +         |
| Eurasian blue tit <i>Cyanistes caeruleus</i>        | +         | +         |
| Great tit <i>Parus major</i>                        | +         | +         |
| Eurasian nuthatch <i>Sitta europaea</i>             | +         | +         |
| Short-toed treecreeper <i>Certhia brachydactyla</i> | +         | +         |
| Eurasian golden oriole <i>Oriolus oriolus</i>       | +         | +         |
| Red-backed shrike <i>Lanius collurio</i>            | +         | -         |
| Eurasian Jay <i>Garrulus glandarius</i>             | +         | +         |
| Eurasian magpie <i>Pica pica</i>                    | -         | +         |
| Hooded crow <i>Corvus cornix</i>                    | +         | +         |
| Common starling <i>Sturnus vulgaris</i>             | +         | +         |
| Common chaffinch <i>Fringilla coelebs</i>           | +         | +         |
| European serin <i>Serinus serinus</i>               | +         | +         |
| European greenfinch <i>Carduelis chloris</i>        | +         | +         |
| European goldfinch <i>Carduelis carduelis</i>       | +         | +         |
